# Supplementary material
Source: ML conference proceedings conference paper supplement (https://openreview.net/forum?id=LKdCkV31T7)
Supplement: supplementary_material [file attachment]

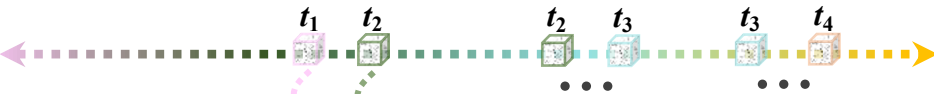

RBF Activator:

$$\tilde{\zeta}_i^{rbf}(t_2) = W_{rbf} \cdot \frac{\exp(-\frac{(t-c_i)^2}{2s_i^2})}{\sum_{j=1}^N \exp(-\frac{(t-c_j)^2}{2s_j^2})}$$

$\leftarrow S$ : RBF Scales  
 $\leftarrow C$ : RBF Center

Gaussian Interpolator:

$$\Delta \mu_{t_1 \rightarrow t_2}^{(\theta)}, \text{vec}(\Delta R_{t_1 \rightarrow t_2})^{(\theta)} = \sum_{i=1}^M \tilde{\zeta}_i^{rbf}(t_2) \cdot (\mu_i^{t_1}, \text{vec}(R_i^{t_1}))$$

Feature Interpolator:

$$\Sigma_{t_2} = \Delta R_{t_1 \rightarrow t_2} \Sigma_{t_1} \Delta R_{t_1 \rightarrow t_2}^T, \Delta \Phi_{t_1 \rightarrow t_2}^{feat} = \sum_{i=1}^M \tilde{\zeta}_i^{rbf}(t_2) \cdot \Phi_i^{feat}$$

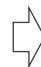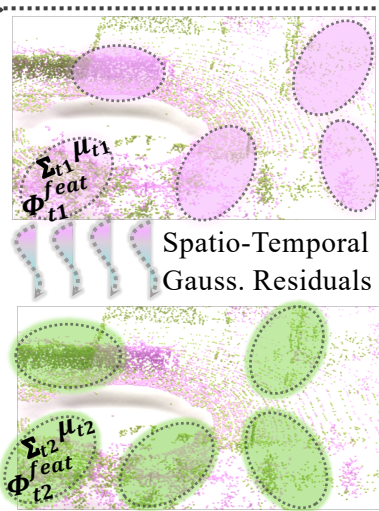

- Gaussian Sphere at  $t_1$
- Gaussian Sphere at  $t_2$
- $\mu_t$  Gaussian Mean
- $\Sigma$  Gaussian Covariance
- $\Phi_t^{feat}$  Gaussian Features
- $R$  Rotation Matrix
