# Supplementary material
Source: ML conference proceedings conference paper supplement (https://openreview.net/forum?id=LKdCkV31T7)

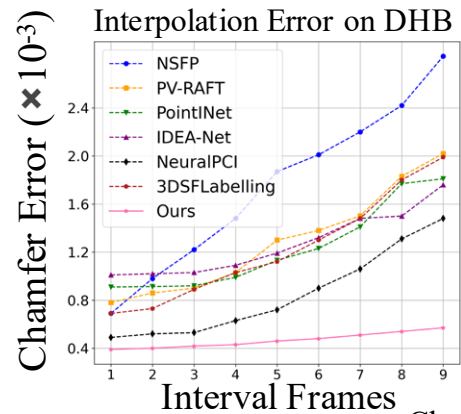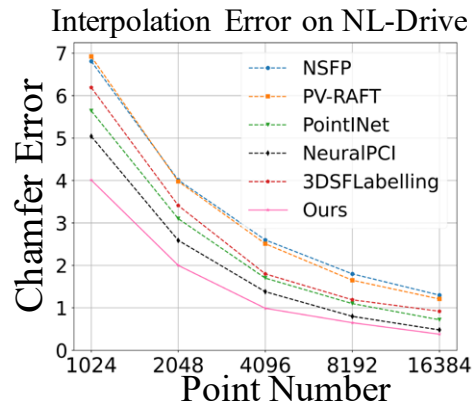

Small Chamfer error color band Large

NeuralPCI

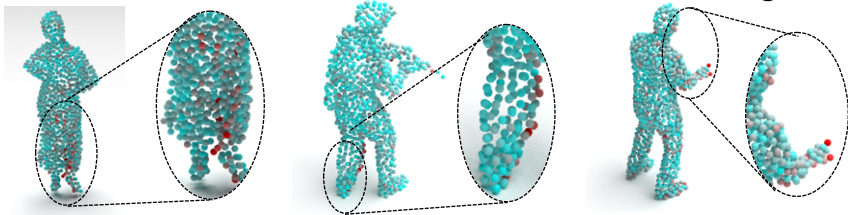

3DSFLabelling  
(FLOT)

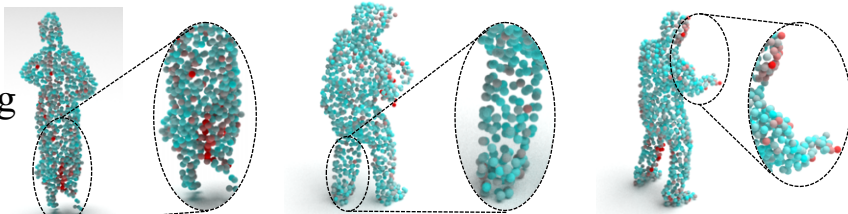

NeuroGauss4D  
(Ours)

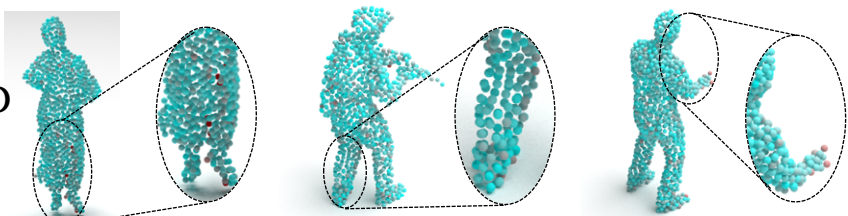

Frame Interpolation in Large-scale LiDAR Scenes

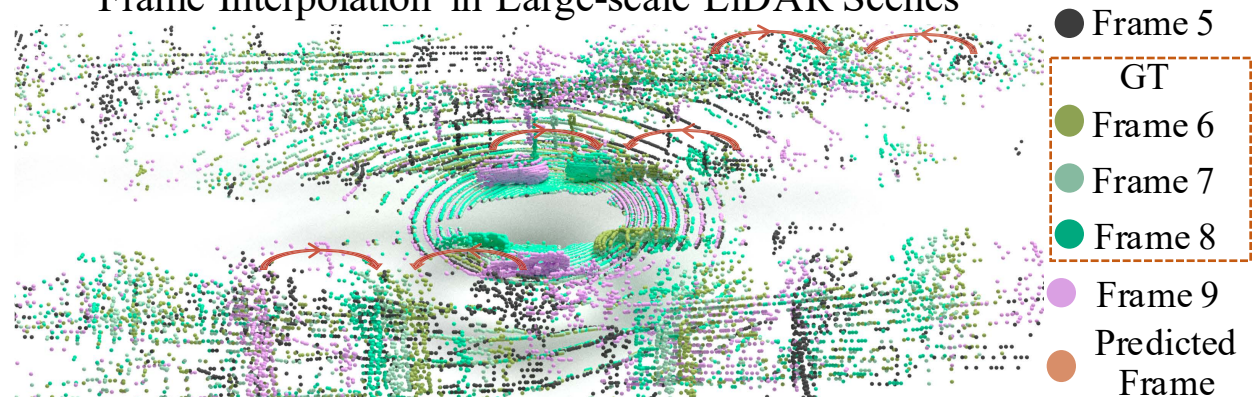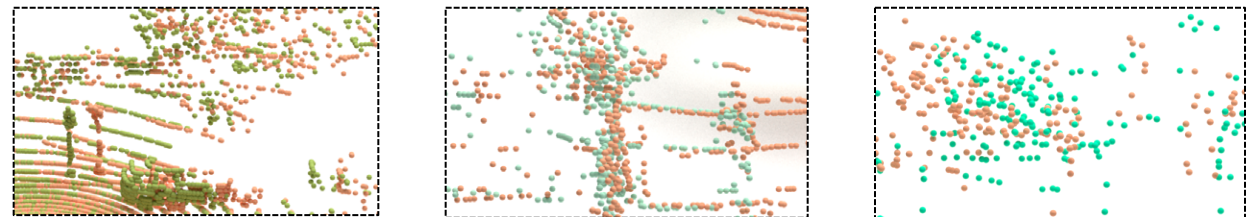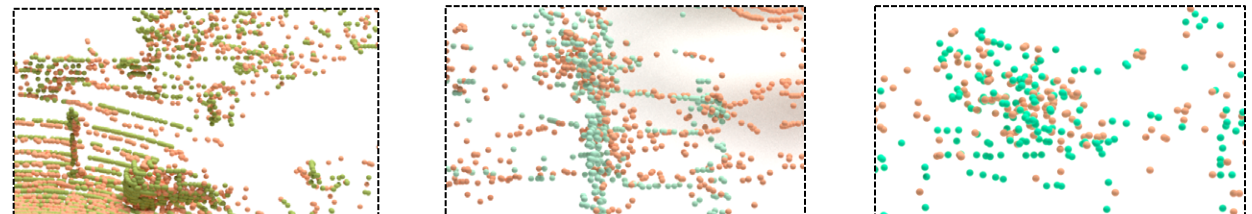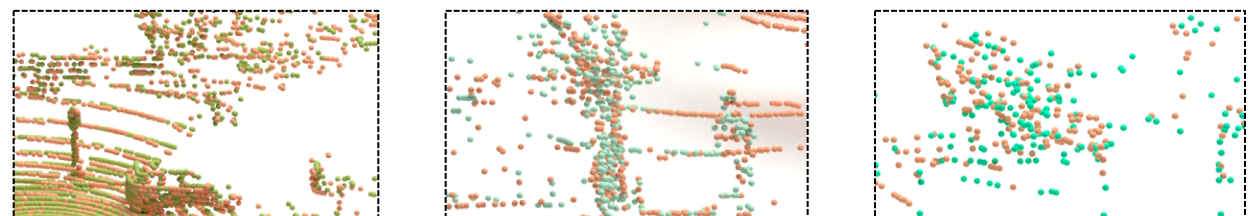

Supplement: supplementary_material [file attachment]
