# Supplementary material
Source: ML conference proceedings conference paper supplement (https://openreview.net/forum?id=LKdCkV31T7)

## Temporal Synchronization / Auto-labeling

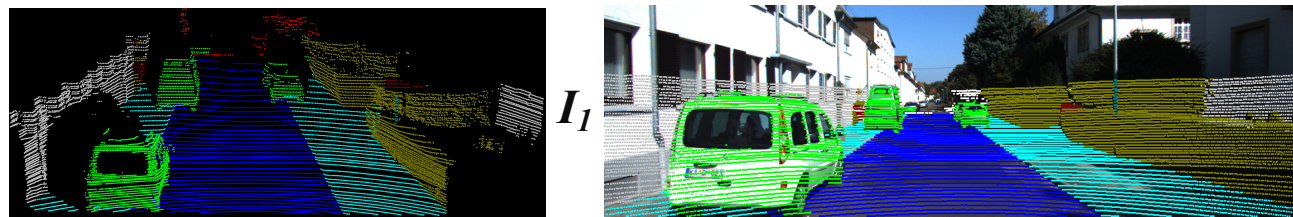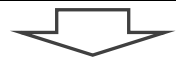

Interpolated Frames  
( $P_2^*, I_2^*$ )

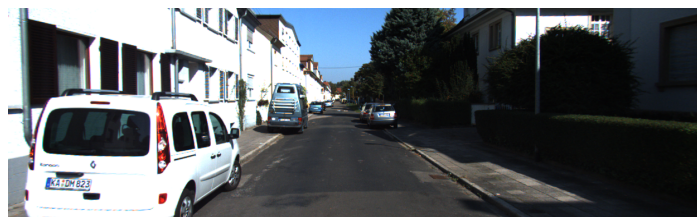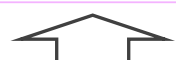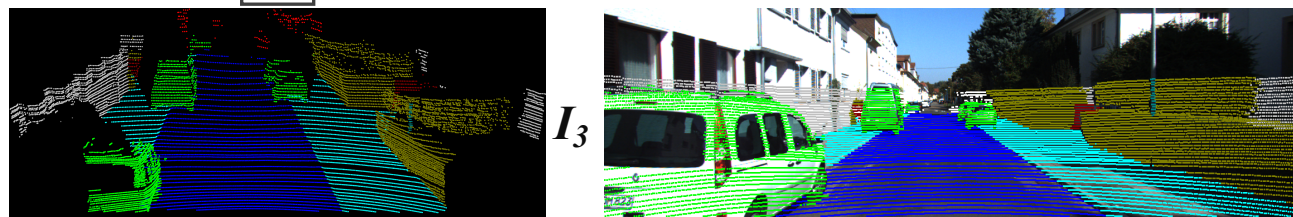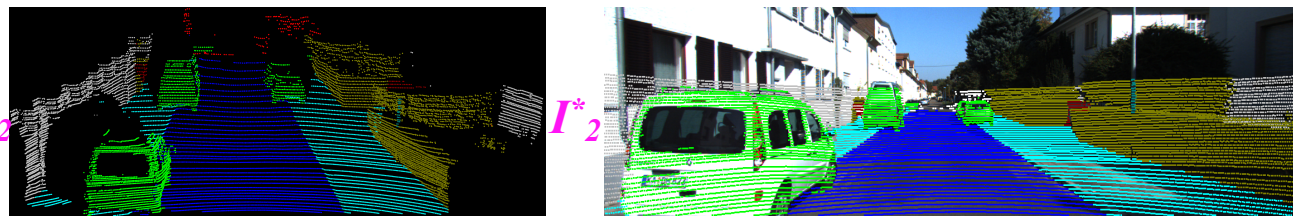

## Densifying Point Clouds with NeuroGauss4D-PC

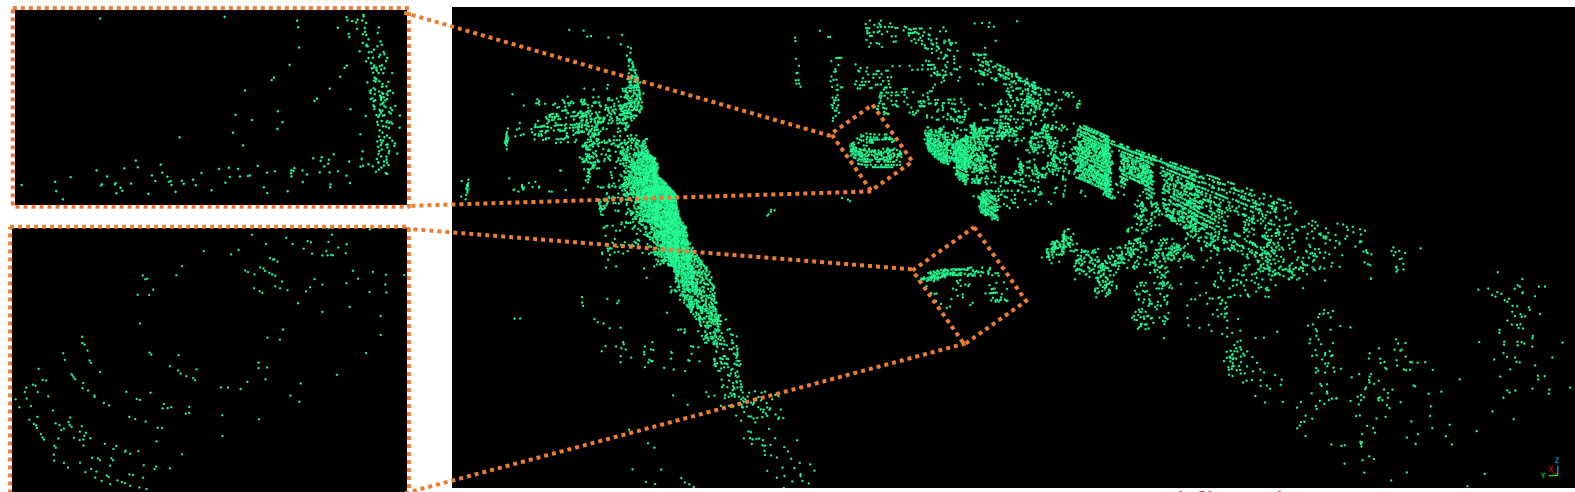

Densification

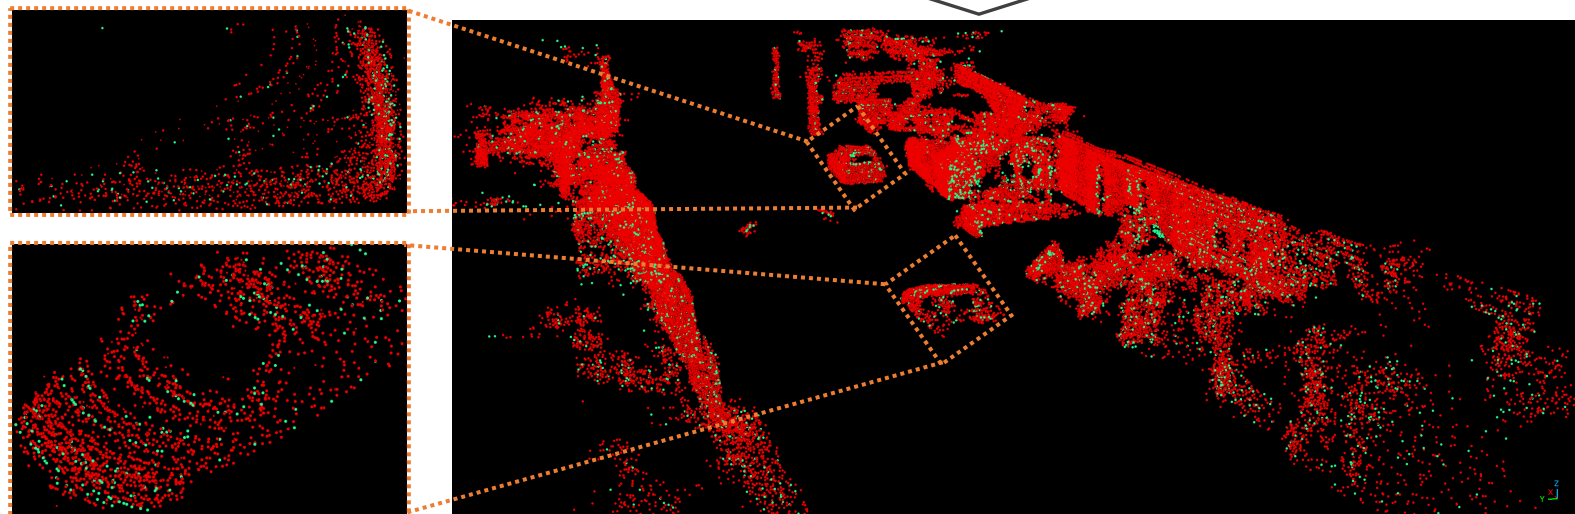

Supplement: supplementary_material [file attachment]
